# Supplementary material for: Distal weight bearing in transtibial prosthesis users wearing pin suspension
Source: Frontiers journal article supplement (doi:10.3389/fresc.2023.1322202), 2023-12-21

**Supplementary Figure F1. Data Processing Flowchart for Identification of Activities.**

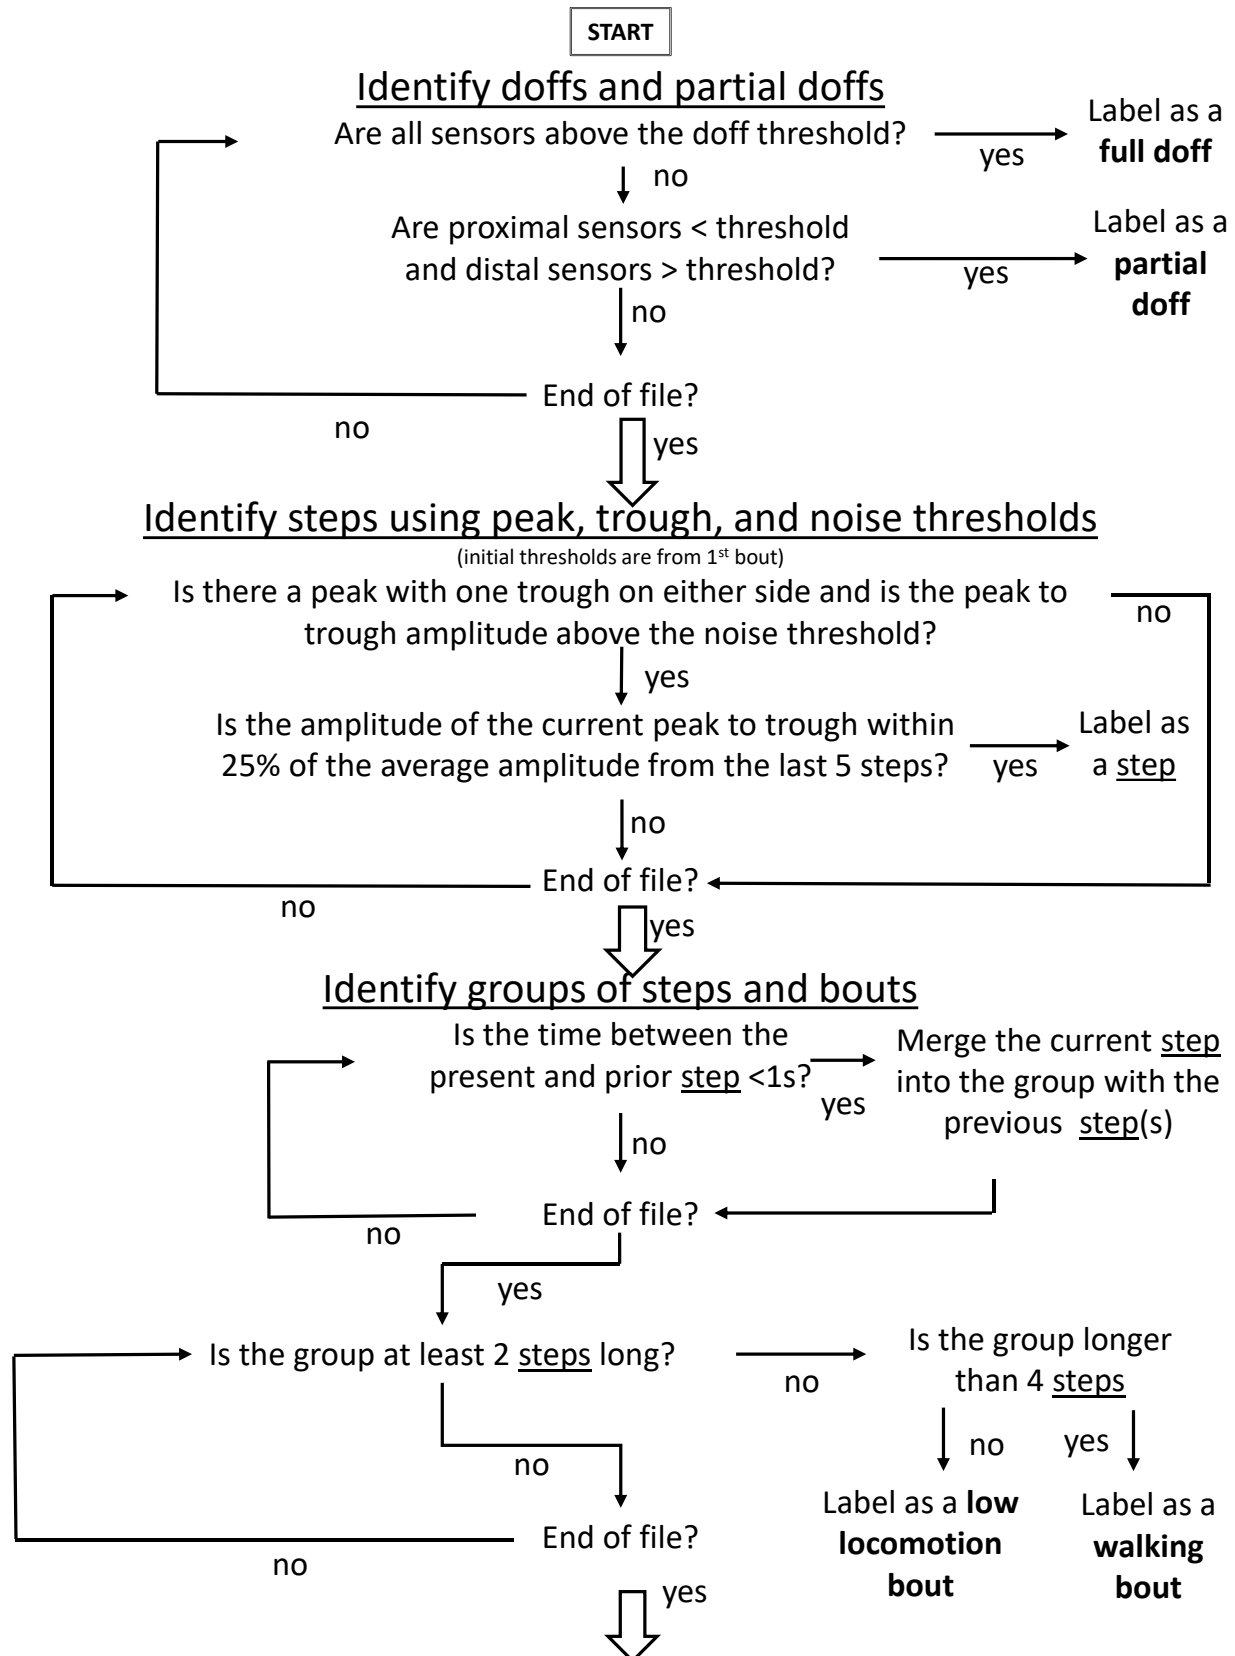

## Create envelope for sit-stand detection

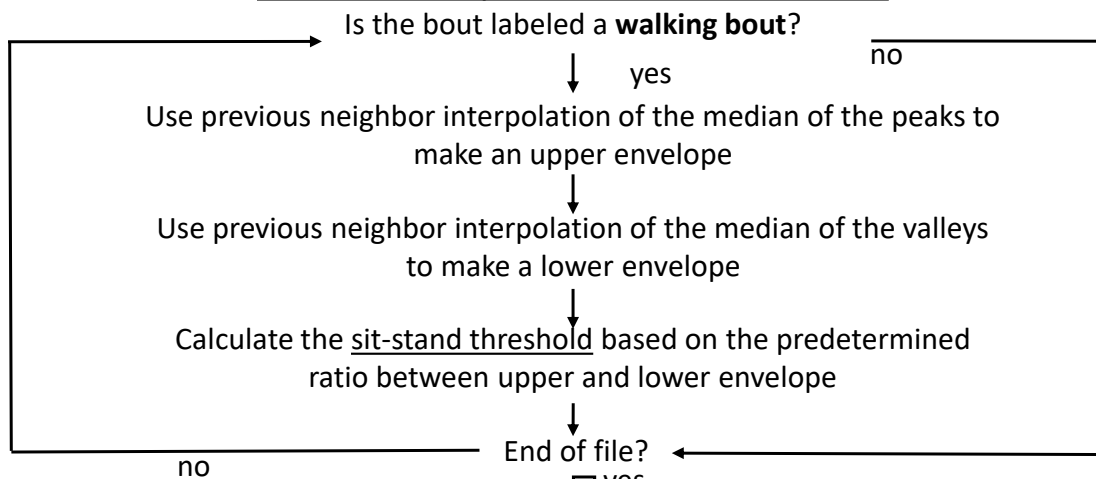

## Identify shifts

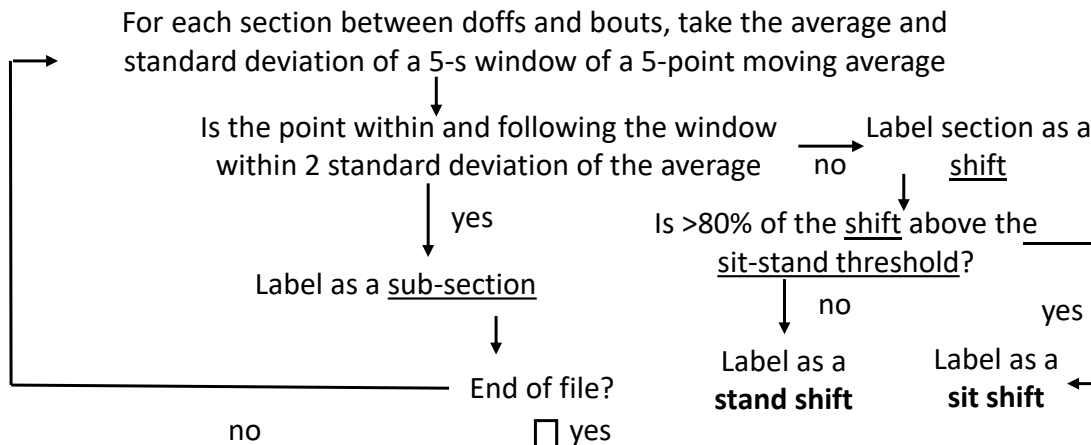

## Label sub-sections as sit, sit shift, stand or stand shift

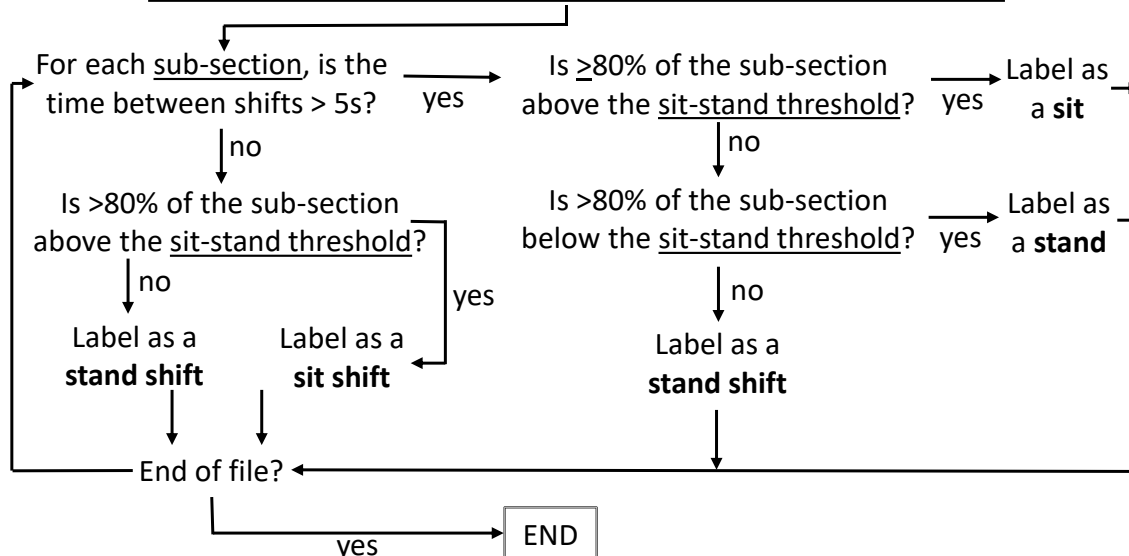

Supplement: Image_1.pdf [file Image_1.pdf]
